# Supplementary material for: De novo prediction of cell-type complexity in single-cell RNA-seq and tumor microenvironments
Source: PubMed Central journal article supplement (PMC6607449; doi:10.26508/lsa.201900443), 2019-07-02
Supplement: LSA-2019-00443_review_history.pdf [file LSA-2019-00443_review_history.pdf]

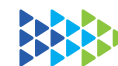

## **De novo prediction of cell-type complexity in single-cell RNA-seq and tumor microenvironments**

Jun Woo, Boris Winterhoff, Tim Starr, Constantin Aliferis, and Jinhua Wang  
DOI: 10.26508/lsa.201900443

---

### **Review timeline:**

|                     |              |
|---------------------|--------------|
| Submission Date:    | 29 May 2019  |
| Editorial Decision: | 29 May 2019  |
| Revision Received:  | 24 June 2019 |
| Accepted:           | 24 June 2019 |

---

### **Report:**

(Note: Letters and reports are not edited. The original formatting of letters and referee reports may not be reflected in this compilation.)

Please note that the manuscript was previously reviewed at another journal and the reports were taken into account in the decision-making process at Life Science Alliance. Since the original reviews are not subject to Life Science Alliance's transparent review process policy, the reports and author response cannot be published.

---

1st Editorial Decision

29 May 2019

Thank you for transferring your revised manuscript entitled "De novo prediction of cell-subtype complexity in single-cell RNA-seq and tumor heterogeneity" to Life Science Alliance. Your work was reviewed at another journal twice before, and the reviewer reports and your responses have been transferred to us with your permission.

Two reviewers criticized the lack of broader conceptual advance provided by your study. This is not a concern for publication here and we appreciate how you addressed the individual concerns of all reviewers, including now a more thorough discussion of existing approaches for choosing *k* in single-cell RNA-seq analyses and benchmarking your approach. We would thus be happy to publish your paper in Life Science Alliance pending final revisions necessary to meet our formatting guidelines:

- please upload all figures (also supplementary figures) as individual files, the legends should only be in the main manuscript docx file
- please make sure to add for each author the contributions in our submission system
- please link your ORCID iD to your profile in our submission system, you should have received an email with instructions on how to do so

To upload the final version of your manuscript, please log in to your account with the login name (you will have to request a new password):

<https://lsa.msubmit.net/cgi-bin/main.plex>

You will be guided to complete the submission of your revised manuscript and to fill in all necessary information.

To avoid unnecessary delays in the acceptance and publication of your paper, please read the following information carefully.

### **A. FINAL FILES:**

These items are required for acceptance.



-- An editable version of the final text (.DOC or .DOCX) is needed for copyediting (no PDFs).

-- High-resolution figure, supplementary figure and video files uploaded as individual files: See our detailed guidelines for preparing your production-ready images, <http://www.life-science-alliance.org/authors>

-- Summary blurb (enter in submission system): A short text summarizing in a single sentence the study (max. 200 characters including spaces). This text is used in conjunction with the titles of papers, hence should be informative and complementary to the title. It should describe the context and significance of the findings for a general readership; it should be written in the present tense and refer to the work in the third person. Author names should not be mentioned.

## B. MANUSCRIPT ORGANIZATION AND FORMATTING:

Full guidelines are available on our Instructions for Authors page, <http://www.life-science-alliance.org/authors>

We encourage our authors to provide original source data, particularly uncropped/-processed electrophoretic blots and spreadsheets for the main figures of the manuscript. If you would like to add source data, we would welcome one PDF/Excel-file per figure for this information. These files will be linked online as supplementary "Source Data" files.

**\*\*Submission of a paper that does not conform to Life Science Alliance guidelines will delay the acceptance of your manuscript.\*\***

**\*\*It is Life Science Alliance policy that if requested, original data images must be made available to the editors. Failure to provide original images upon request will result in unavoidable delays in publication. Please ensure that you have access to all original data images prior to final submission.\*\***

**\*\*The license to publish form must be signed before your manuscript can be sent to production. A link to the electronic license to publish form will be sent to the corresponding author only. Please take a moment to check your funder requirements.\*\***

**\*\*Reviews, decision letters, and point-by-point responses associated with peer-review at Life Science Alliance will be published online, alongside the manuscript. If you do want to opt out of this transparent process, please let us know immediately.\*\***

Thank you for your attention to these final processing requirements. Please revise and format the manuscript and upload materials within 7 days.

Thank you for this interesting contribution, we look forward to publishing your paper in Life Science Alliance.

---

2nd Editorial Decision

24 June 2019

Thank you for submitting your Methods entitled "De novo prediction of cell-type complexity in single-cell RNA-seq and tumor microenvironments.". It is a pleasure to let you know that your manuscript is now accepted for publication in Life Science Alliance. Congratulations on this interesting work.

The final published version of your manuscript will be deposited by us to PubMed Central upon online publication.

Your manuscript will now progress through copyediting and proofing. It is journal policy that authors provide original data upon request.

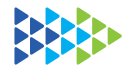

Reviews, decision letters, and point-by-point responses associated with peer-review at Life Science Alliance will be published online, alongside the manuscript. If you do want to opt out of having the reviewer reports and your point-by-point responses displayed, please let us know immediately.

\*\*\*IMPORTANT: If you will be unreachable at any time, please provide us with the email address of an alternate author. Failure to respond to routine queries may lead to unavoidable delays in publication.\*\*\*

Scheduling details will be available from our production department. You will receive proofs shortly before the publication date. Only essential corrections can be made at the proof stage so if there are any minor final changes you wish to make to the manuscript, please let the journal office know now.

**DISTRIBUTION OF MATERIALS:**

Authors are required to distribute freely any materials used in experiments published in Life Science Alliance. Authors are encouraged to deposit materials used in their studies to the appropriate repositories for distribution to researchers.

You can contact the journal office with any questions, [contact@life-science-alliance.org](mailto:contact@life-science-alliance.org)

Again, congratulations on a very nice paper. I hope you found the review process to be constructive and are pleased with how the manuscript was handled editorially. We look forward to future exciting submissions from your lab.
