# Supplementary material for: De novo prediction of cell-type complexity in single-cell RNA-seq and tumor microenvironments
Source: Life Sci Alliance. 2019 Jul 2;2(4):e201900443. doi: 10.26508/lsa.201900443 (PMC6607449; doi:10.26508/lsa.201900443)
Supplement: Supplementary file 2 [file LSA-2019-00443_TableS2.xlsx]

## Sheet: Sheet1
Clusters	Acinar	Activated stellate	Quiescent stellate	α-cells	β-cells	δ-cells	Ductal	Endothelial	ε-cells	γ-cells	Macrophage	Mast cells	Schwann cells	T cells
1	62
2	46					1	2
3	2						49
4			1				65
5								127
6		47	2
7			88	1				1
8				103	4					1
9				117	1		1
10								1		69
11					74			1
12					146
13					182
14					25	3
15					21	1
16		1			4
17					146		1
18		1					1				14	8	5	2
19				1	1
20		1		10	1				11
21				2	49
22					14
23					199
24		1		1	2	88			1
25				1	3	121	1		1
